# Supplementary material for: Inclusion Complexes of Melphalan with Gemini-Conjugated β-Cyclodextrin: Physicochemical Properties and Chemotherapeutic Efficacy in In-Vitro Tumor Models
Source: PubMed Central journal article supplement (PMC6781286; doi:10.3390/pharmaceutics11090427), 2019-08-22
Supplement: pharmaceutics-11-00427-s001.pdf [file pharmaceutics-11-00427-s001.pdf]

# Supplementary Materials: Inclusion Complexes of Melphalan with Gemini-Conjugated $\beta$ -Cyclodextrin: Physicochemical Properties and Chemotherapeutic Efficacy in In-Vitro Tumor Models

Waleed Mohammed-Saeid, Abdalla H Karoyo, Ronald E Verrall, Lee D Wilson and Ildiko Badea

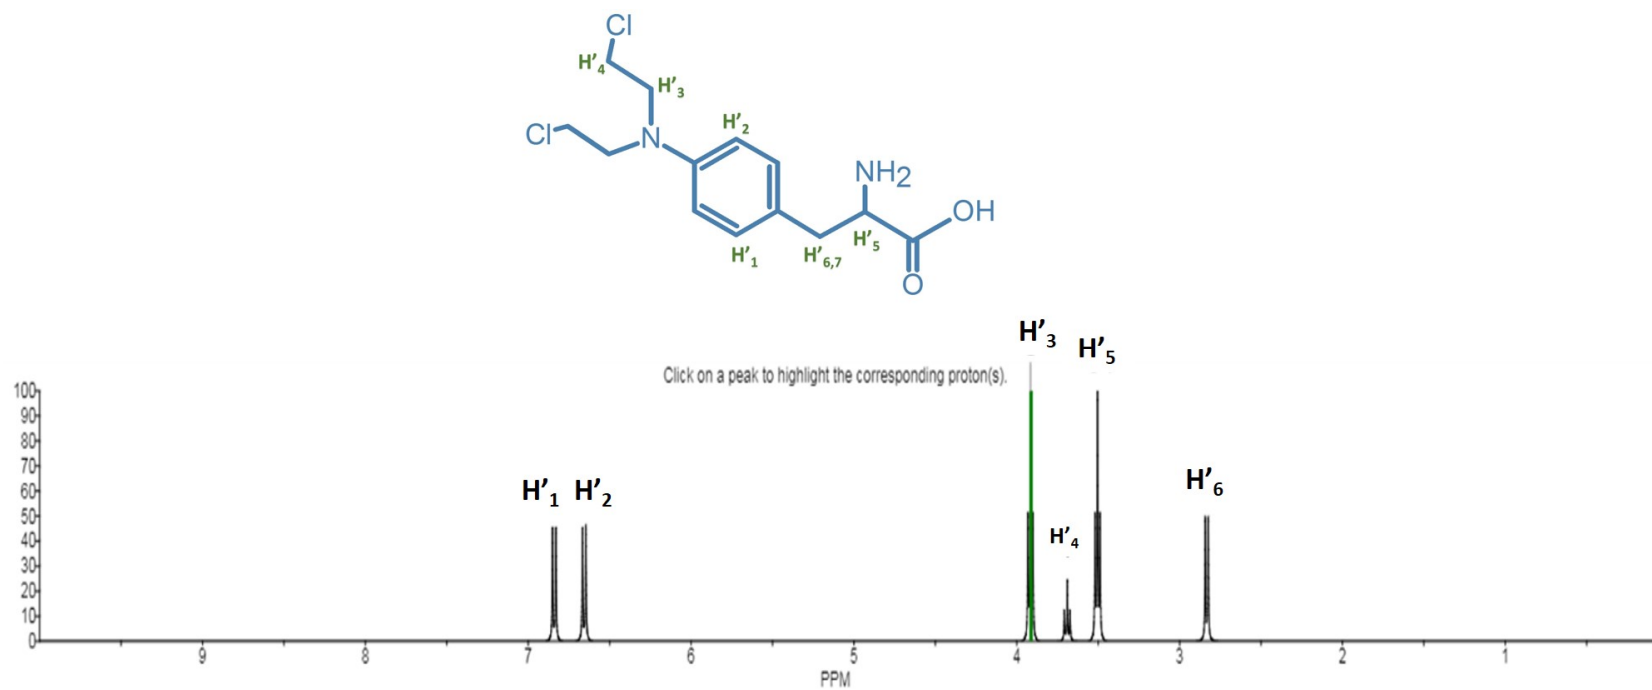

**Figure S1.** Predicted  $^1\text{H}$  NMR spectra of Melphalan. Spectra created using nmrdb online tool ([www.nmrdb.org](http://www.nmrdb.org))<sup>1</sup>.

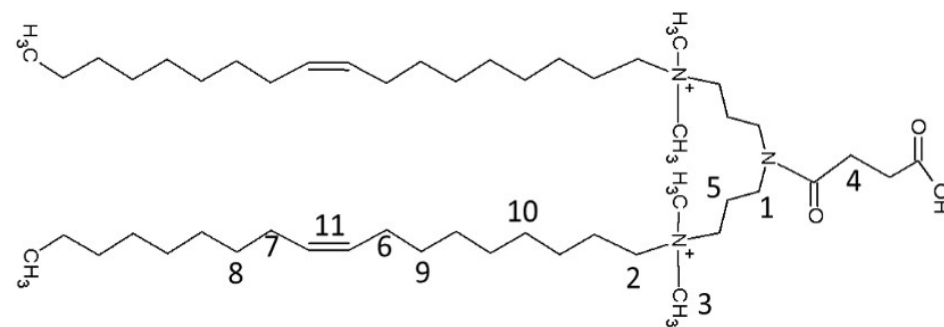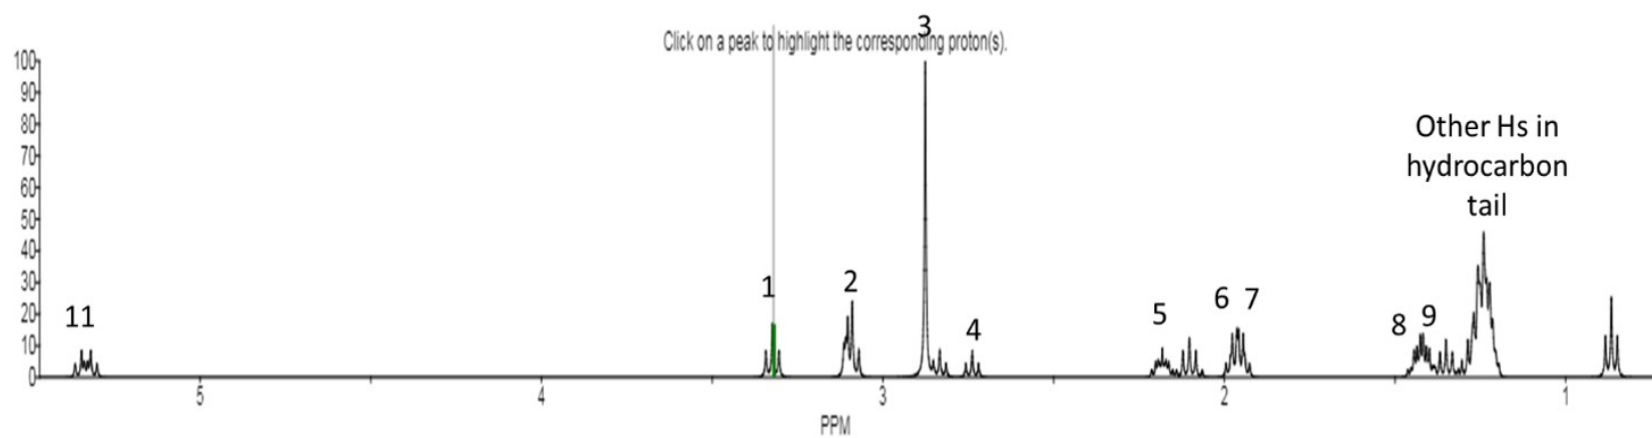

**Figure S2.** Predicted  $^1\text{H}$  NMR spectra of 18:1 gemini surfactant. Spectra created using nmrdB online tool ([www.nmrdB.org](http://www.nmrdB.org))<sup>1</sup>.

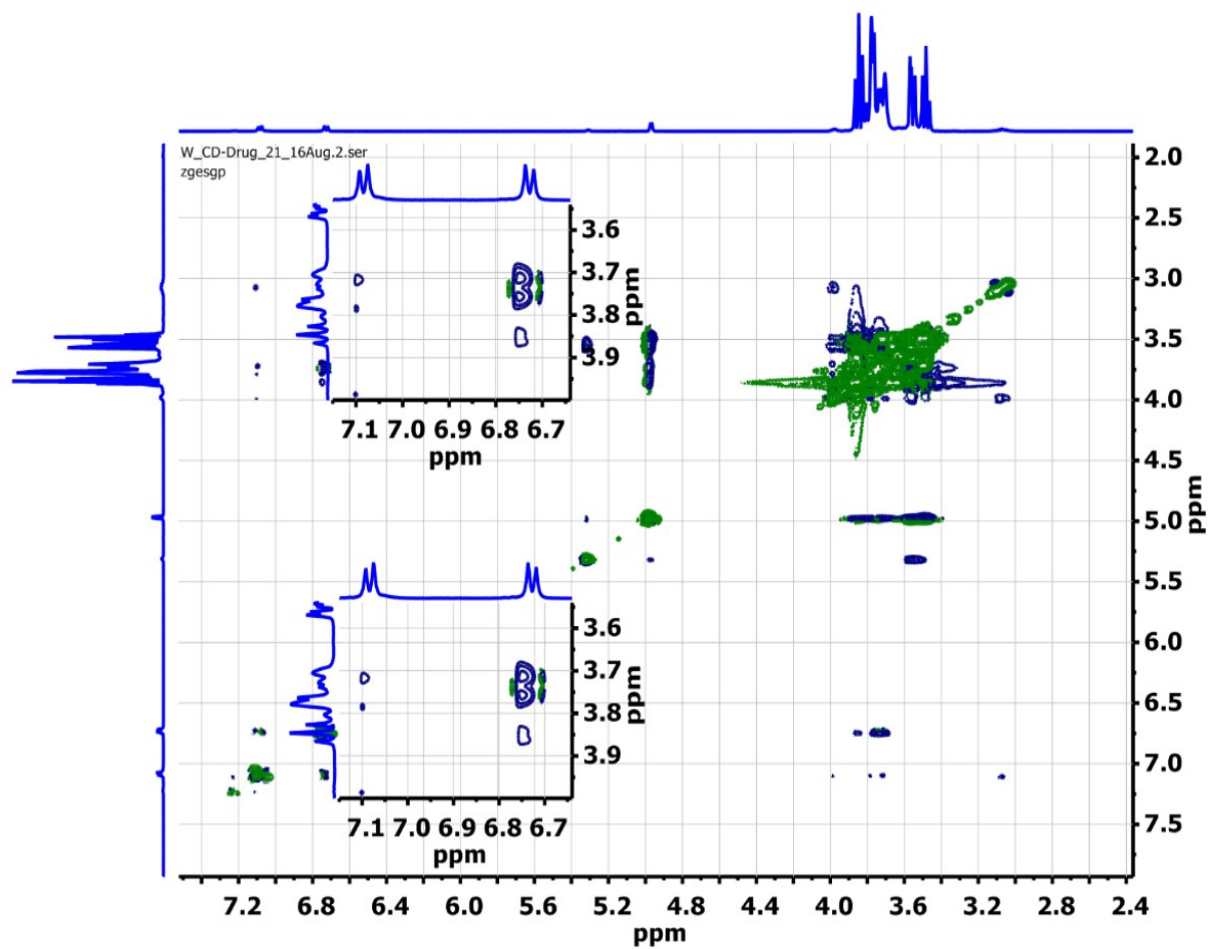

**Figure S3.** 2D ROESY spectrum of  $\beta$ CD-Mel at a 2:1 host-guest mole ratio, showing cross-peaks between  $\beta$ CD internal  $^1\text{H}$  cavity and Mel nuclei.

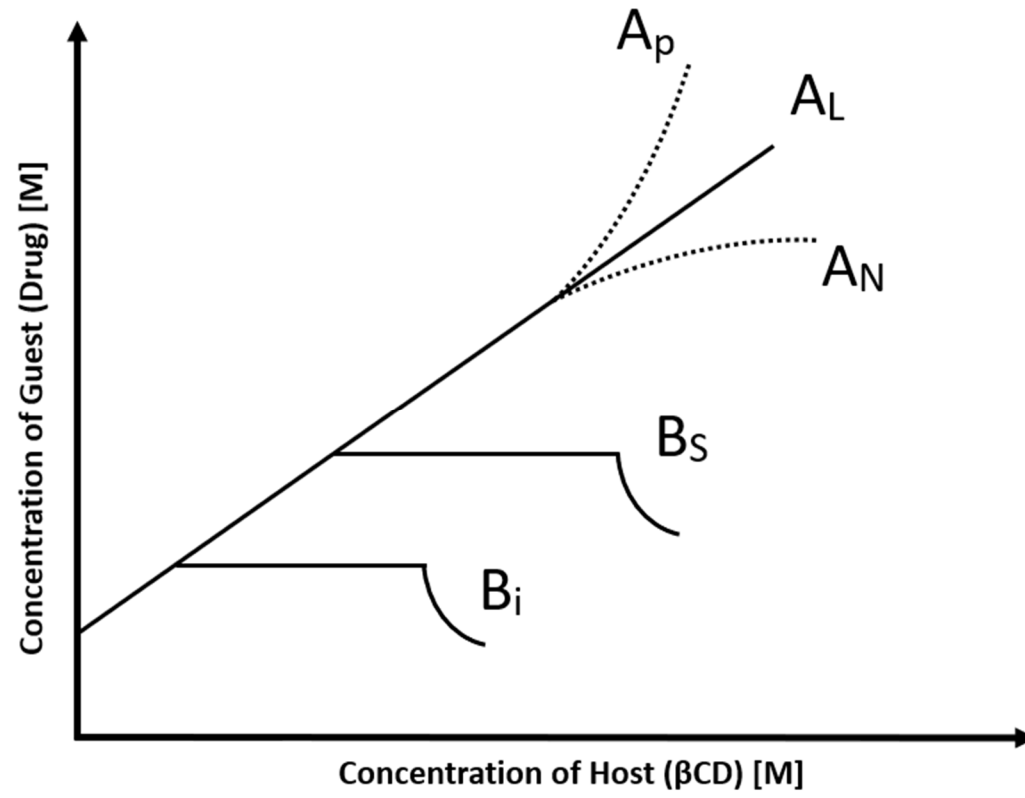

Figure S4. Phase solubility diagram<sup>2</sup>.

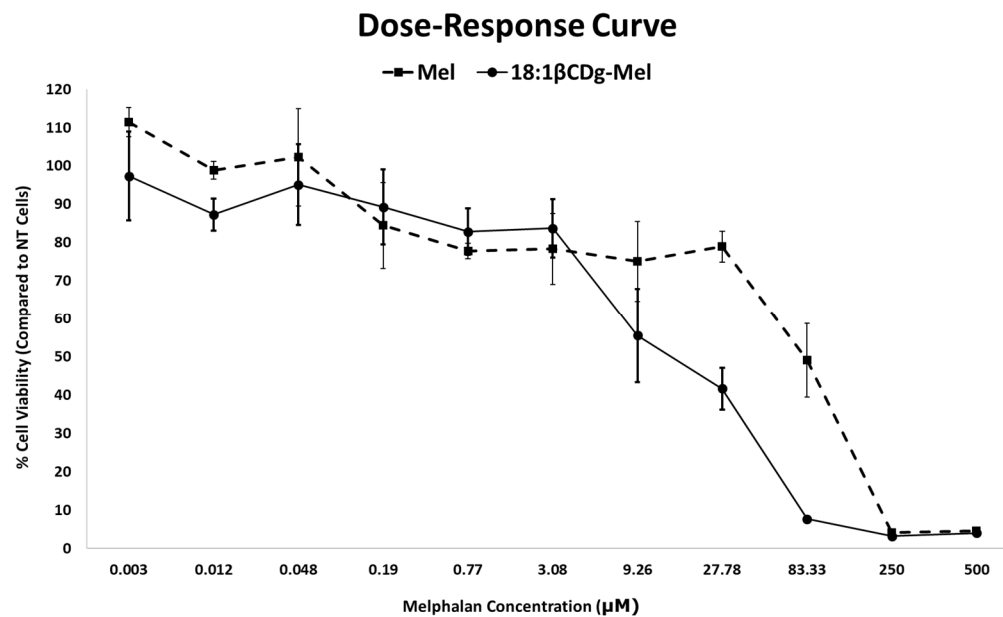

**Figure S5.** Cytotoxic efficiency of Melphalan in human malignant melanoma (A375) cell line). A375 cells were seeded at  $1 \times 10^4$  cells/well in 96-well plate. Toxicity was reported using MTT Assay in comparison with non-treated cells (100% viability).  $N = 3 \pm SD$ .

#### Reference

1. Banfi, D., Patiny, L. [www.nmrdb.org](http://www.nmrdb.org): Resurrecting and Processing NMR Spectra On-line. *Chimia Int. J. Chem.* **2008**, *62*, 280–281.
2. Higuchi, T., Connors, A. Phase-solubility techniques. *Adv. Anal. Chem. Instrum.* **1965**, *4*, 117–210.
